# Supplementary material
Source: Research Square preprint supplement (doi:10.21203/rs.3.rs-8786359/v1)
Supplement: Supplementary file 1 [file 7f1bfc667e5cfaa4401b79c2.docx]

**[Supplementary Appendix](https://ai.nejm.org/doi/full/10.1056/AIoa2300099" \l "ap2)**

**Supplemental Methods**

**Exclusion criteria for patients during the data collection** **phase**

1. Inpatient dialysis patients.
2. Patients who refuse or are unable to sign the informed consent form.
3. Patients who object to blood pressure measurements every 30 minutes.
4. Patients with serious data loss, such as those who do not use a swipe card to record weight or frequently remove their blood pressure airbags. Data quality control was the responsibility of two technicians.

**Data Characteristics of predictive model**

Demographic, clinical and laboratory data obtained from electronic health records and dialysis machine data were collected and trained.

Patients’ demographics included age, gender, diabetes status, duration of dialysis, vascular access type.

Laboratory variables were captured monthly of hemoglobin, high-sensitivity C-reactive protein, N-terminal pro-brain natriuretic peptide (NT-proBNP). Liver function, pre- and post-dialysis BUN and creatine, electrolyte parameters, intact parathyroid hormone, and iron parameters were collected each three months.

Dialysis machine data included variables such as blood purification mode, pre- and post-dialysis weight, predialysis dry weight, interdialytic weight gain, ultrafiltration volume, blood flow rate, dialysate flow rate, dialysate temperature, dialysate conductivity, ultrafiltration rate, systolic blood pressure(SBP) and diastolic blood pressure (DBP) and heart rate measurements every 30 minutes in one hematodialysis session.

**Research Framework for Machine Learning Prediction Models**

RNN is a deep learning and time series model that takes patients' blood pressure measurements at different time intervals as a sequential dataset with timestamps1. It takes into account the past information of related neurons when predicting the next blood pressure measurement.

The second model is XGBoost, whose learning process can explore key variables and their decision boundaries2. It fits the best classification model using multiple segments of the decision tree that minimize the error.

The third model is LightGBM, which is also a decision tree-based machine learning model like XGBoost. LightGBM supports more sampling methods, including row and column sampling, while XGBoost only supports row-based sampling3.

**Evaluation Metrics for Predictive Models**

In this study, various evaluation metrics were used to assess the performance of the models, including sensitivity (also known as TPR), specificity (also known as TNR), false negative rate (FNR), false positive rate (FPR), accuracy, precision, F1 score, the area under the precision-recall curve, and the receiver operating characteristic curve. Each of these evaluation metrics has its own focus. The threshold was set to maximize the F1 score of the positive values. Each of the metric calculations is displayed in Fig. S1, with true negative (TN), false negative (FN), true positive (TP) and false positive (FP) values.

Accuracy represents the proportion of correctly classified samples among the total samples.

Precision represents the proportion of true positive samples among all samples predicted as positive.

Recall represents the proportion of true positive samples among all actual positive samples.

The F1 score is the harmonic mean of precision and recall, comprehensively reflecting both precision and recall sensitivity.

The PR curve is a curve where the horizontal axis represents precision and the vertical axis represents recall. The PR curve is used to evaluate the impact of increasing recall (i.e., the true positive rate) on precision. It is generally accepted that the larger the area under the curve in the lower-left region is, the better the overall model performance in terms of precision and recall, and thus, the better the F1 score.

**Inclusion criteria for patients in AI intervention phase**

1. The participants must be at least 18 years old, have completed three sessions of outpatient hemodialysis treatment per week at this center for more than one year.
2. Participants must be included in the initial model training data set.
3. The incidence rate of IDH must be at least 30% within one year prior to enrollment for participants.
4. Participants should be able to tolerate high-flux hemodialysis (HFHD) and Fresenius FX80 dialyzers (Fresenius Medical Care, Bad Homburg, Germany).

**Exclusion criteria for patients in AI intervention phase**

1. Inpatient dialysis patients.
2. Patients who refuse or are unable to sign the informed consent form.
3. Patients who object to blood pressure measurements every 30 minutes.
4. Patients with serious data loss, such as those who do not use a swipe card to record weight or frequently remove their blood pressure airbags. Data quality control was the responsibility of two technicians.

**Intradialytic hypotension (IDH) interventions in the control group**

We handled intradialytic hypotension in the control group according to Chinese expert consensus on prevention and treatment of IDH in 2022.

- In Trendelenburg position as frequently as possible
- Oxygen inhalation and electrocardiographic monitoring
- Stop ultrafiltration and reduce blood flow
- Administer 100 milliliters of ultrapure dialysate or normal saline intravenously
- Consider pressor agent, replace the treatment mode if necessary
- Establish venous access and advanced life support for severe patient

**[Supplemental Table](https://www.ncbi.nlm.nih.gov/pmc/articles/PMC10310501/" \l "sup1)** **1. Basic parameters of different machine learning models under three IDH definitions**

|  |  | ROC-AUC | PR-AUC | TP | FP | TN | FN | TPR | FPR | Precision | Accuracy | F1 |
| --- | --- | --- | --- | --- | --- | --- | --- | --- | --- | --- | --- | --- |
| IDH1 |  |  |  |  |  |  |  |  |  |  |  |  |
| RNN | Training set | 0.935 | 0.634 | 13726 | 29171 | 179590 | 2144 | 0.865 | 0.140 | 0.320 | 0.861 | 0.467 |
|  | Validation Set | 0.929 | 0.591 | 4564 | 9913 | 59608 | 759 | 0.857 | 0.143 | 0.315 | 0.857 | 0.461 |
|  | Test Set 1 | 0.914 | 0.517 | 7546 | 17656 | 112727 | 1715 | 0.815 | 0.135 | 0.299 | 0.861 | 0.438 |
|  | Test Set 2 | 0.906 | 0.436 | 614 | 1563 | 18159 | 222 | 0.734 | 0.079 | 0.282 | 0.913 | 0.408 |
|  | Test Set 3 | 0.914 | 0.511 | 8160 | 19219 | 130886 | 1937 | 0.808 | 0.128 | 0.298 | 0.868 | 0.436 |
| XGBoost | Training set | 0.956 | 0.698 | 15510 | 32762 | 214933 | 1578 | 0.908 | 0.132 | 0.321 | 0.870 | 0.475 |
|  | Validation Set | 0.934 | 0.590 | 4937 | 11440 | 71056 | 795 | 0.861 | 0.139 | 0.302 | 0.861 | 0.447 |
|  | Test Set 1 | 0.914 | 0.498 | 8301 | 21360 | 130793 | 1771 | 0.824 | 0.140 | 0.280 | 0.857 | 0.418 |
|  | Test Set 2 | 0.914 | 0.444 | 681 | 1944 | 20953 | 230 | 0.748 | 0.085 | 0.259 | 0.909 | 0.385 |
|  | Test Set 3 | 0.915 | 0.494 | 8982 | 23304 | 151746 | 2001 | 0.818 | 0.133 | 0.278 | 0.864 | 0.415 |
| LightGBM | Training set | 0.939 | 0.656 | 14964 | 33785 | 213910 | 2124 | 0.876 | 0.136 | 0.307 | 0.864 | 0.455 |
|  | Validation Set | 0.930 | 0.589 | 4920 | 11687 | 70809 | 812 | 0.858 | 0.142 | 0.296 | 0.858 | 0.441 |
|  | Test Set 1 | 0.913 | 0.505 | 8351 | 22196 | 129957 | 1721 | 0.829 | 0.146 | 0.273 | 0.853 | 0.411 |
|  | Test Set 2 | 0.915 | 0.450 | 693 | 2057 | 20840 | 218 | 0.761 | 0.090 | 0.252 | 0.904 | 0.379 |
|  | Test Set 3 | 0.914 | 0.501 | 9044 | 24253 | 150797 | 1939 | 0.824 | 0.139 | 0.272 | 0.859 | 0.409 |
| IDH2 |  |  |  |  |  |  |  |  |  |  |  |  |
| RNN | Training set | 0.940 | 0.638 | 12792 | 28271 | 181680 | 1888 | 0.871 | 0.135 | 0.312 | 0.866 | 0.459 |
|  | Validation Set | 0.931 | 0.581 | 4242 | 9734 | 60182 | 686 | 0.861 | 0.139 | 0.304 | 0.861 | 0.449 |
|  | Test Set 1 | 0.915 | 0.506 | 7057 | 17770 | 113304 | 1513 | 0.824 | 0.136 | 0.284 | 0.862 | 0.423 |
|  | Test Set 2 | 0.908 | 0.409 | 552 | 1645 | 18173 | 188 | 0.746 | 0.083 | 0.251 | 0.911 | 0.376 |
|  | Test Set 3 | 0.915 | 0.498 | 7609 | 19415 | 131477 | 1701 | 0.817 | 0.129 | 0.282 | 0.868 | 0.419 |
| XGBoost | Training set | 0.955 | 0.676 | 14367 | 32809 | 216113 | 1494 | 0.906 | 0.132 | 0.305 | 0.870 | 0.456 |
|  | Validation Set | 0.936 | 0.585 | 4599 | 11269 | 71636 | 724 | 0.864 | 0.136 | 0.290 | 0.864 | 0.434 |
|  | Test Set 1 | 0.919 | 0.499 | 7778 | 21361 | 131526 | 1560 | 0.833 | 0.140 | 0.267 | 0.859 | 0.404 |
|  | Test Set 2 | 0.918 | 0.428 | 624 | 2102 | 20892 | 190 | 0.767 | 0.091 | 0.229 | 0.904 | 0.353 |
|  | Test Set 3 | 0.920 | 0.493 | 8402 | 23463 | 152418 | 1750 | 0.828 | 0.133 | 0.264 | 0.865 | 0.400 |
| LightGBM | Training set | 0.940 | 0.646 | 13870 | 32641 | 216281 | 1991 | 0.875 | 0.131 | 0.298 | 0.869 | 0.445 |
|  | Validation Set | 0.933 | 0.584 | 4600 | 11254 | 71651 | 723 | 0.864 | 0.136 | 0.290 | 0.864 | 0.434 |
|  | Test Set 1 | 0.917 | 0.498 | 7734 | 21177 | 131710 | 1604 | 0.828 | 0.139 | 0.268 | 0.860 | 0.404 |
|  | Test Set 2 | 0.914 | 0.428 | 621 | 1939 | 21055 | 193 | 0.763 | 0.084 | 0.243 | 0.911 | 0.368 |
|  | Test Set 3 | 0.917 | 0.493 | 8355 | 23116 | 152765 | 1797 | 0.823 | 0.131 | 0.266 | 0.866 | 0.402 |
| IDH3 |  |  |  |  |  |  |  |  |  |  |  |  |
| RNN | Training set | 0.914 | 0.865 | 66148 | 24113 | 120876 | 13494 | 0.831 | 0.166 | 0.733 | 0.833 | 0.779 |
|  | Validation Set | 0.912 | 0.861 | 22202 | 8111 | 40033 | 4498 | 0.832 | 0.169 | 0.732 | 0.832 | 0.779 |
|  | Test Set 1 | 0.908 | 0.845 | 37784 | 14421 | 78498 | 8941 | 0.809 | 0.155 | 0.724 | 0.833 | 0.764 |
|  | Test Set 2 | 0.906 | 0.811 | 4350 | 2003 | 13042 | 1163 | 0.789 | 0.133 | 0.685 | 0.846 | 0.733 |
|  | Test Set 3 | 0.908 | 0.842 | 42134 | 16424 | 91540 | 10104 | 0.807 | 0.152 | 0.720 | 0.834 | 0.761 |
| XGBoost | Training set | 0.928 | 0.880 | 75468 | 27744 | 148054 | 13517 | 0.848 | 0.158 | 0.731 | 0.844 | 0.785 |
|  | Validation Set | 0.911 | 0.855 | 24629 | 10173 | 48231 | 5195 | 0.826 | 0.174 | 0.708 | 0.826 | 0.762 |
|  | Test Set 1 | 0.900 | 0.828 | 41335 | 18736 | 92177 | 9977 | 0.806 | 0.169 | 0.688 | 0.823 | 0.742 |
|  | Test Set 2 | 0.895 | 0.785 | 4846 | 2872 | 14794 | 1296 | 0.789 | 0.163 | 0.628 | 0.825 | 0.699 |
|  | Test Set 3 | 0.900 | 0.823 | 46181 | 21608 | 106971 | 11273 | 0.804 | 0.168 | 0.681 | 0.823 | 0.738 |
| LightGBM | Training set | 0.919 | 0.867 | 74516 | 29031 | 146767 | 14469 | 0.837 | 0.165 | 0.720 | 0.836 | 0.774 |
|  | Validation Set | 0.909 | 0.853 | 24612 | 10209 | 48195 | 5212 | 0.825 | 0.175 | 0.707 | 0.825 | 0.762 |
|  | Test Set 1 | 0.901 | 0.829 | 41309 | 18478 | 92435 | 10003 | 0.805 | 0.167 | 0.691 | 0.824 | 0.744 |
|  | Test Set 2 | 0.899 | 0.793 | 4886 | 2745 | 14921 | 1256 | 0.796 | 0.155 | 0.640 | 0.832 | 0.710 |
|  | Test Set 3 | 0.901 | 0.826 | 46195 | 21223 | 107356 | 11259 | 0.804 | 0.165 | 0.685 | 0.825 | 0.740 |

IDH, Intradialytic hypotension; RNN, recurrent neural network; XGBoost, Extreme Gradient Boosting; LightGBM, Light Gradient Boosting Machine; ROC-AUC, receiver operating characteristic area under the curve; PR-AUC, precision‒recall area under the curve; TP, true positive; FP, false positive; TN, true negative; FN, false negative; TPR, true positive rate; FPR, false positive rate.

**[Supplemental Table](https://www.ncbi.nlm.nih.gov/pmc/articles/PMC10310501/" \l "sup1) 2. Basic parameters of XGBoost machine learning model under IDH1**

| Training set | threshold | TP | FP | TN | FN | TPR | FPR | Precision | Accuracy | F1 |
| --- | --- | --- | --- | --- | --- | --- | --- | --- | --- | --- |
| 0.069 | 29388 | 61336 | 405040 | 3279 | 89.96% | 13.15% | 32.39% | 87.05% | 0.476 |
| 0.322 | 20710 | 12453 | 453923 | 11957 | 63.40% | 2.67% | 62.45% | 95.11% | 0.629 |
| 0.100 | 28158 | 46589 | 419787 | 4509 | 86.20% | 9.99% | 37.67% | 89.76% | 0.524 |
| 0.200 | 24668 | 24188 | 442188 | 7999 | 75.51% | 5.19% | 50.49% | 93.55% | 0.605 |
| **0.300** | **21408** | **13961** | **452415** | **11259** | **65.53%** | **2.99%** | **60.53%** | **94.95%** | 0.629 |
| 0.400 | 18198 | 8017 | 458359 | 14469 | 55.71% | 1.72% | 69.42% | 95.49% | 0.618 |
| 0.500 | 14975 | 4403 | 461973 | 17692 | 45.84% | 0.94% | 77.28% | 95.57% | 0.576 |
| 0.600 | 11844 | 2227 | 464149 | 20823 | 36.26% | 0.48% | 84.17% | 95.38% | 0.507 |
| 0.700 | 8575 | 949 | 465427 | 24092 | 26.25% | 0.20% | 90.04% | 94.98% | 0.407 |
| 0.800 | 5257 | 297 | 466079 | 27410 | 16.09% | 0.06% | 94.65% | 94.45% | 0.275 |
| 0.900 | 2215 | 37 | 466339 | 30452 | 6.78% | 0.01% | 98.36% | 93.89% | 0.127 |
| Validation Set | 0.069 | 9647 | 21436 | 133447 | 1549 | 86.16% | 13.84% | 31.04% | 86.16% | 0.456 |
| 0.322 | 6419 | 4777 | 150106 | 4777 | 57.33% | 3.08% | 57.33% | 94.25% | 0.573 |
| 0.100 | 9167 | 16517 | 138366 | 2029 | 81.88% | 10.66% | 35.69% | 88.83% | 0.497 |
| 0.200 | 7832 | 8911 | 145972 | 3364 | 69.95% | 5.75% | 46.78% | 92.61% | 0.561 |
| **0.300** | **6646** | **5306** | **149577** | **4550** | **59.36%** | **3.43%** | **55.61%** | **94.07%** | 0.574 |
| 0.400 | 5536 | 3266 | 151617 | 5660 | 49.45% | 2.11% | 62.89% | 94.63% | 0.554 |
| 0.500 | 4482 | 1957 | 152926 | 6714 | 40.03% | 1.26% | 69.61% | 94.78% | 0.508 |
| 0.600 | 3409 | 1135 | 153748 | 7787 | 30.45% | 0.73% | 75.02% | 94.63% | 0.433 |
| 0.700 | 2371 | 560 | 154323 | 8825 | 21.18% | 0.36% | 80.89% | 94.35% | 0.336 |
| 0.800 | 1481 | 218 | 154665 | 9715 | 13.23% | 0.14% | 87.17% | 94.02% | 0.230 |
| 0.900 | 602 | 49 | 154834 | 10594 | 5.38% | 0.03% | 92.47% | 93.59% | 0.102 |

IDH, Intradialytic hypotension; XGBoost, Extreme Gradient Boosting; TP, true positive; FP, false positive; TN, true negative; FN, false negative; TPR, true positive rate; FPR, false positive rate.

**[Supplemental Table](https://www.ncbi.nlm.nih.gov/pmc/articles/PMC10310501/" \l "sup1) 3. The Impact of AI-assisted on IDH Incidence**

|  | **AI-assisted group**  **MD (95% CI)** | **P value** | **Control group**  **MD (95% CI)** | **P value** | **Between-Group difference MD (95% CI)** | **P value** |
| --- | --- | --- | --- | --- | --- | --- |
| Pre-intervention | 55.56% (40.41%, 70.70%) |  | 56.67% (41.52%, 71.81%) |  | -1.11% (-22.53%, 20.31%) | 0.918 |
| Intervention period | 46.11% (30.96%, 61.26%) |  | 60.56% (45.41%, 75.70%) |  | -14.44% (-35.87%, 6.98%) | 0.182 |
| Post-intervention | 36.67% (21.52%, 51.81%) |  | 46.67% (31.52%, 61.81%) |  | -10.00% (-31.42%, 11.42%) | 0.354 |
| Intervention period vs Pre-intervention | -9.44% (-21.89%, 3.00%) | 0.134 | 3.89% (-8.55%, 16.33%) | 0.534 | -13.33% (-30.93%, 4.26%) | 0.135 |
| Post-intervention vs Pre-intervention | -18.89% (-31.33%, -6.45%) | 0.004 | -10.00% (-22.44%, 2.44%) | 0.113 | -8.89% (-26.48%, 8.71%) | 0.316 |
| Post-intervention vs Intervention period | -9.44% (-21.89%, 3.00%) | 0.134 | -13.89% (-26.33%, -1.45%) | 0.029 | 4.44% (-13.15%, 22.04%) | 0.615 |

**[Supplemental Table](https://www.ncbi.nlm.nih.gov/pmc/articles/PMC10310501/" \l "sup1) 4. The Impact of AI-assisted on the average SBP**

|  | **AI-assisted group**  **MD (95% CI)** | **P value** | **Control group**  **MD (95% CI)** | **P value** | **Between-Group difference MD (95% CI)** | **P value** |
| --- | --- | --- | --- | --- | --- | --- |
| Pre-intervention | 110.59 (101.84, 119.33) |  | 111.78 (103.04, 120.52) |  | -1.19 (-13.95, 11.57) | 0.852 |
| Intervention period | 113.75 (105.00, 122.49) |  | 110.91 (102.16, 119.65) |  | 2.84 (-9.92, 15.60) | 0.657 |
| Post-intervention | 116.36 (107.61, 125.10) |  | 111.59 (102.84, 120.33) |  | 4.77 (-7.99, 17.53) | 0.457 |
| Intervention period vs Pre-intervention | 3.16 (-1.04, 7.36) | 0.137 | -0.87 (-5.07, 3.33) | 0.679 | 4.03 (-1.91, 9.97) | 0.179 |
| Post-intervention vs Pre-intervention | 5.77 (1.57, 9.97) | 0.008 | -0.19 (-4.39, 4.01) | 0.927 | 5.96 (0.02, 11.90) | **0.049** |
| Post-intervention vs Intervention period | 2.61 (-1.59, 6.81) | 0.219 | 0.68 (-3.52, 4.88) | 0.747 | 1.93 (-4.01, 7.87) | 0.518 |

**[Supplemental Table](https://www.ncbi.nlm.nih.gov/pmc/articles/PMC10310501/" \l "sup1) 5. The Impact of AI-assisted on the average SBP during IDH**

|  | **AI-assisted group**  **MD (95% CI)** | **P value** | **Control group**  **MD (95% CI)** | **P value** | **Between-Group difference MD (95% CI)** | **P value** |
| --- | --- | --- | --- | --- | --- | --- |
| Pre-intervention | 82.87 (80.58, 85.15) |  | 81.66 (79.29, 84.03) |  | 1.20 (-2.14, 4.55) | 0.474 |
| Intervention period | 84.48 (82.11, 86.85) |  | 84.46 (82.00, 86.93) |  | 0.01 (-3.46, 3.49) | 0.993 |
| Post-intervention | 83.83 (81.54, 86.12) |  | 82.06 (79.69, 84.43) |  | 1.76 (-1.58, 5.11) | 0.295 |
| Intervention period vs Pre-intervention | 1.61 (-1.53, 4.76) | 0.308 | 2.80 (-0.46, 6.06) | 0.091 | -1.19 (-5.72, 3.34) | 0.601 |
| Post-intervention vs Pre-intervention | 0.96 (-2.13, 4.05) | 0.534 | 0.40 (-2.80, 3.60) | 0.802 | 0.56 (-3.88, 5.01) | 0.801 |
| Post-intervention vs Intervention period | -0.65 (-3.80, 2.50) | 0.680 | -2.40 (-5.66, 0.86) | 0.146 | 1.75 (-2.78, 6.28) | 0.442 |

**[Supplemental Table](https://www.ncbi.nlm.nih.gov/pmc/articles/PMC10310501/" \l "sup1) 6. The Impact of AI-assisted on the average decrease of SBP**

|  | **AI-assisted group**  **MD (95% CI)** | **P value** | **Control group**  **MD (95% CI)** | **P value** | **Between-Group difference MD (95% CI)** | **P value** |
| --- | --- | --- | --- | --- | --- | --- |
| Pre-intervention | 8.92 (6.89, 10.94) |  | 8.88 (6.78, 10.97) |  | 0.04 (-2.94, 3.02) | 0.979 |
| Intervention period | 6.65 (4.56, 8.73) |  | 6.99 (4.83, 9.16) |  | -0.35 (-3.42, 2.73) | 0.823 |
| Post-intervention | 8.58 (6.56, 10.61) |  | 7.59 (5.49, 9.69) |  | 0.99 (-1.99, 3.98) | 0.507 |
| Intervention period vs Pre-intervention | -2.27 (-4.66, 0.13) | 0.063 | -1.88 (-4.37, 0.60) | 0.135 | -0.39 (-3.84, 3.07) | 0.824 |
| Post-intervention vs Pre-intervention | -0.33 (-2.68, 2.01) | 0.777 | -1.29 (-3.71, 1.14) | 0.293 | 0.95 (-2.42, 4.33) | 0.574 |
| Post-intervention vs Intervention period | 1.93 (-0.46, 4.33) | 0.111 | 0.60 (-1.89, 3.08) | 0.632 | 1.34 (-2.11, 4.79) | 0.440 |

**[Supplemental Table](https://www.ncbi.nlm.nih.gov/pmc/articles/PMC10310501/" \l "sup1) 7. The Impact of AI-assisted on the cumulative decrease in SBP**

|  | **AI-assisted group**  **MD (95% CI)** | **P value** | **Control group**  **MD (95% CI)** | **P value** | **Between-Group difference MD (95% CI)** | **P value** |
| --- | --- | --- | --- | --- | --- | --- |
| Pre-intervention | 206.13 (95.23, 317.03) |  | 214.88 (99.91, 329.84) |  | -8.74 (-174.17, 156.68) | 0.916 |
| Intervention period | 94.95 (-17.06, 206.97) |  | 212.39 (96.13, 328.64) |  | -117.43 (-284.59, 49.72) | 0.165 |
| Post-intervention | 103.07 (-7.83, 213.97) |  | 155.80 (40.84, 270.77) |  | -52.74 (-218.16, 112.69) | 0.525 |
| Intervention period vs Pre-intervention | -111.18 (-181.38, -40.98) | 0.003 | -2.49 (-75.29, 70.31) | 0.946 | -108.69 (-209.83, -7.56) | **0.036** |
| Post-intervention vs Pre-intervention | -103.07 (-171.53, -34.61) | 0.004 | -59.07 (-129.93, 11.79) | 0.100 | -44.00 (-142.52, 54.53) | 0.374 |
| Post-intervention vs Intervention period | 8.11 (-62.09, 78.31) | 0.818 | -56.58 (-129.38, 16.22) | 0.125 | 64.70 (-36.44, 165.83) | 0.205 |

**[Supplemental Table](https://www.ncbi.nlm.nih.gov/pmc/articles/PMC10310501/" \l "sup1) 8. The Impact of AI-assisted on Patient Clinical Characteristics**

|  |  | **AI-assisted group**  **MD (95% CI)** | **Control group**  **MD (95% CI)** | **Between-Group difference MD (95% CI)** | **P value** |
| --- | --- | --- | --- | --- | --- |
| β2-MG  (mg/l) | Pre-intervention | 33.34 (30.56, 36.13) | 34.44 (31.41, 37.48) | -1.10 (-5.30, 3.10) | 0.594 |
| Post-intervention | 32.84 (30.06, 35.62) | 35.64 (32.64, 38.63) | -2.80 (-7.01, 1.41) | 0.182 |
| Post-intervention vs Pre-intervention | -0.51 (-3.40, 2.39) | 1.20 (-2.13, 4.52) | -1.70 (-6.11, 2.70) | 0.433 |
| Net UFV% | Pre-intervention | 3.83 (3.36, 4.31) | 3.98 (3.50, 4.45) | -0.15 (-0.84, 0.55) | 0.668 |
| Post-intervention | 3.68 (3.20, 4.15) | 3.85 (3.38, 4.33) | -0.17 (-0.86, 0.52) | 0.614 |
| Post-intervention vs Pre-intervention | -0.15 (-0.50, 0.20) | -0.13 (-0.48, 0.22) | -0.03 (-0.52, 0.47) | 0.915 |
| spKt/V | Pre-intervention | 1.62 (1.29, 1.94) | 1.81 (1.48, 2.13) | -0.19 (-0.66, 0.28) | 0.413 |
| Post-intervention | 1.61 (1.28, 1.95) | 1.45 (1.11, 1.79) | 0.16 (-0.33, 0.65) | 0.499 |
| Post-intervention vs Pre-intervention | 0.00 (-0.47, 0.47) | -0.36 (-0.83, 0.12) | 0.35 (-0.31, 1.02) | 0.286 |
| IDWG% | Pre-intervention | 4.21 (3.71, 4.70) | 4.02 (3.52, 4.51) | 0.19 (-0.53, 0.91) | 0.592 |
| Post-intervention | 3.69 (3.19, 4.18) | 3.88 (3.38, 4.37) | -0.19 (-0.91, 0.53) | 0.593 |
| Post-intervention vs Pre-intervention | -0.52 (-0.89, -0.15) | -0.14 (-0.51, 0.23) | -0.38 (-0.91, 0.14) | 0.148 |
| Hemoglobin (g/l) | Pre-intervention | 115.88 (110.94, 120.82) | 118.54 (113.61, 123.47) | -2.66 (-9.82, 4.50) | 0.453 |
| Post-intervention | 115.61 (110.67, 120.55) | 115.22 (110.15, 120.30) | 0.39 (-6.89, 7.67) | 0.914 |
| Post-intervention vs Pre-intervention | -0.27 (-5.05, 4.51) | -3.31 (-8.22, 1.60) | 3.05 (-3.81, 9.90) | 0.370 |
| Hematocrit% | Pre-intervention | 35.27 (33.69, 36.85) | 36.72 (35.14, 38.29) | -1.44 (-3.73, 0.85) | 0.208 |
| Post-intervention | 35.81 (34.23, 37.39) | 35.78 (34.16, 37.40) | 0.03 (-2.30, 2.36) | 0.978 |
| Post-intervention vs Pre-intervention | 0.53 (-0.93, 2.00) | -0.94 (-2.45, 0.57) | 1.47 (-0.63, 3.58) | 0.162 |
| CRP(mg/l)* | Pre-intervention | 1.35 (0.98, 1.72) | 1.77 (1.40, 2.14) | -0.42 (-0.96, 0.12) | 0.123 |
| Post-intervention | 1.90 (1.53, 2.27) | 1.92 (1.53, 2.30) | -0.02 (-0.57, 0.53) | 0.949 |
| Post-intervention vs Pre-intervention | 0.55 (0.03, 1.07) | 0.15 (-0.38, 0.67) | 0.40 (-0.34, 1.14) | 0.279 |
| Albumin (g/l) | Pre-intervention | 39.78 (38.21, 41.35) | 40.18 (38.61, 41.74) | -0.39 (-2.68, 1.89) | 0.726 |
| Post-intervention | 39.16 (37.59, 40.73) | 39.73 (38.13, 41.33) | -0.57 (-2.88, 1.74) | 0.616 |
| Post-intervention vs Pre-intervention | -0.63 (-1.86, 0.61) | -0.45 (-1.72, 0.82) | -0.18 (-1.95, 1.59) | 0.838 |
| Phosphate(mmol/l) | Pre-intervention | 1.85 (1.53, 2.17) | 1.95 (1.63, 2.27) | -0.09 (-0.56, 0.37) | 0.684 |
| Post-intervention | 1.72 (1.40, 2.04) | 2.02 (1.70, 2.35) | -0.30 (-0.77, 0.17) | 0.197 |
| Post-intervention vs Pre-intervention | -0.13 (-0.42, 0.15) | 0.08 (-0.21, 0.36) | -0.21 (-0.61, 0.19) | 0.293 |
| NT-proBNP(pg/ml)* | Pre-intervention | 8.52 (8.14, 8.90) | 8.25 (7.87, 8.62) | 0.27 (-0.27, 0.81) | 0.316 |
| Post-intervention | 8.54 (8.17, 8.92) | 8.30 (7.91, 8.69) | 0.25 (-0.30, 0.80) | 0.373 |
| Post-intervention vs Pre-intervention | 0.02 (-0.50, 0.55) | 0.05 (-0.48, 0.58) | -0.03 (-0.77, 0.72) | 0.946 |
| PTH(ng/l)* | Pre-intervention | 5.56 (5.29, 5.83) | 5.51 (5.24, 5.79) | 0.05 (-0.34, 0.44) | 0.806 |
| Post-intervention | 5.55 (5.28, 5.82) | 5.51 (5.24, 5.78) | 0.04 (-0.35, 0.43) | 0.837 |
| Post-intervention vs Pre-intervention | -0.01 (-0.39, 0.37) | 0.00 (-0.38, 0.38) | -0.01 (-0.54, 0.53) | 0.977 |

* Given that the data exhibits a certain skewness, this is the result of a lognormal transformation.

**β**2-MG, **β**2-Microglobulin; UFV, ultrafiltration volume; spKt/V, single pool Kt/V; IDWG, interdialytic weight gain; CRP, C-reactive protein; NT-proBNP, N-terminal pro-B-type natriuretic peptide; PTH, parathyroid hormone

**Supplemental Figure 1. The RNN models for predicting the ROC-AUC curve and PR-AUC curve under three IDH definitions.**


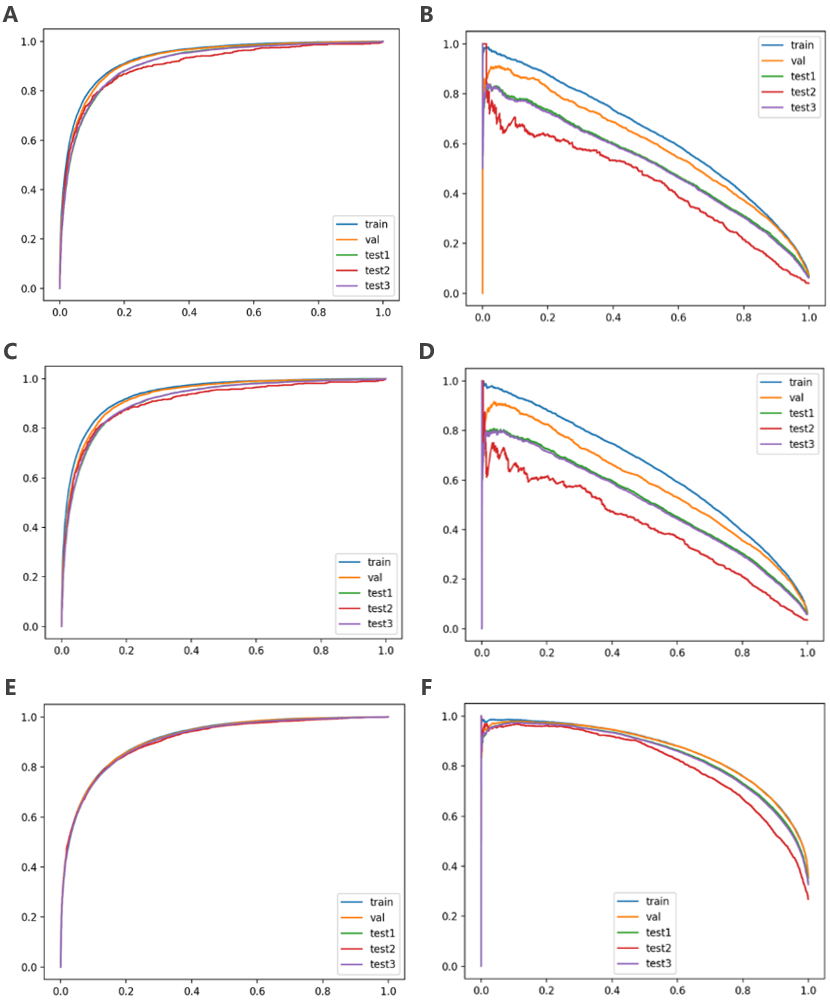


A: ROC-AUC curve under IDH1, B: PR-AUC curve under IDH1, C: ROC-AUC curve under IDH2, D: PR-AUC curve under IDH2, E: ROC-AUC curve under IDH3, F: PR-AUC curve under IDH3

**Supplemental Figure 2. XGBoost models for predicting the ROC-AUC curve and PR-AUC curve under three IDH definitions.**


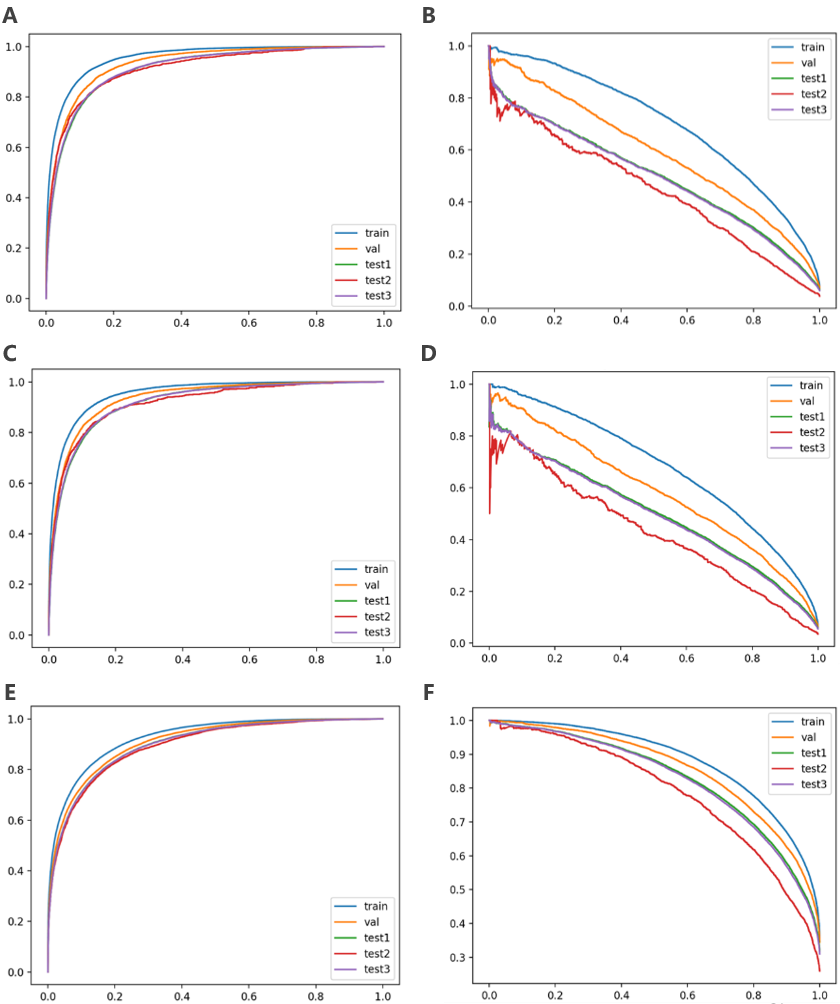


A: ROC-AUC curve under IDH1, B: PR-AUC curve under IDH1, C: ROC-AUC curve under IDH2, D: PR-AUC curve under IDH2, E: ROC-AUC curve under IDH3, F: PR-AUC curve under IDH3

**Supplemental Figure 3. LightGBM models for predicting the ROC-AUC curve and PR-AUC curve under the three IDH definitions.**


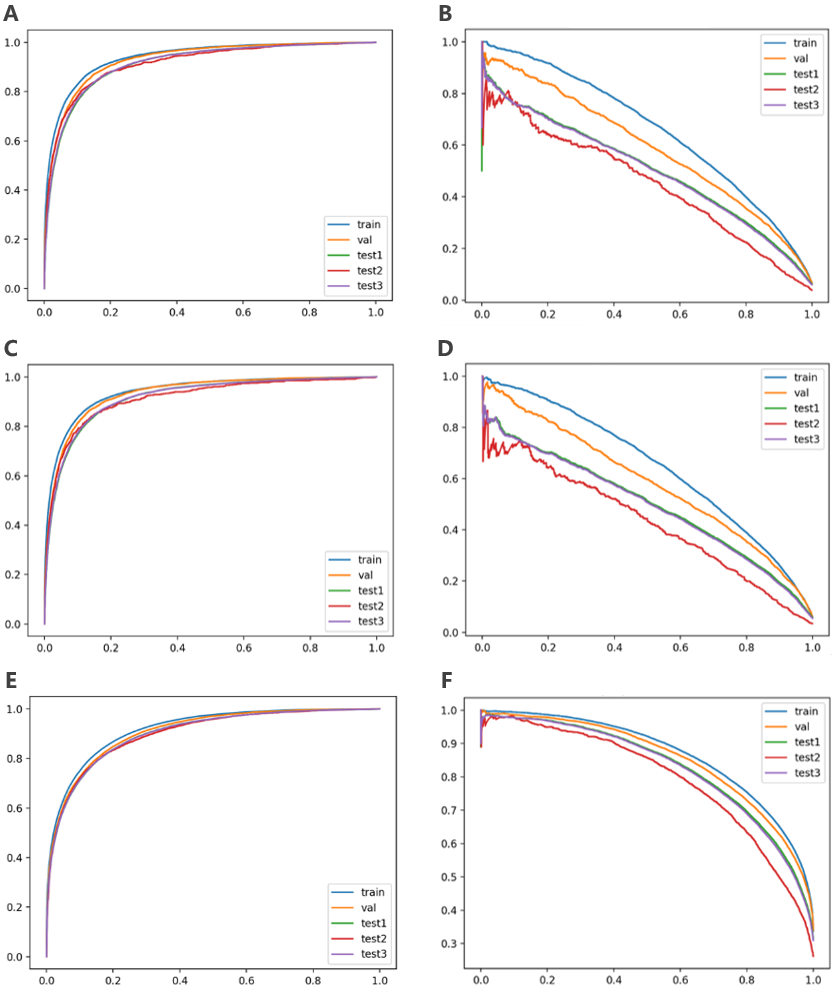


A: ROC-AUC curve under IDH1, B: PR-AUC curve under IDH1, C: ROC-AUC curve under IDH2, D: PR-AUC curve under IDH2, E: ROC-AUC curve under IDH3, F: PR-AUC curve under IDH3

**Supplemental Figure 4.** Platt scaling plots employed for model calibration. Figures A and B depict the calibration curves for Test Set 1 and Test Set 2 under the IDH1 definition, respectively; Figures C and D show the calibration curves for Test Set 1 and Test Set 2 under IDH2, respectively; Figures E and F present the calibration curves for Test Set 1 and Test Set 2 under IDH3, respectively. IDH, Intradialytic hypotension; RNN, recurrent neural network; XGBoost, Extreme Gradient Boosting; LightGBM, Light Gradient Boosting Machine.


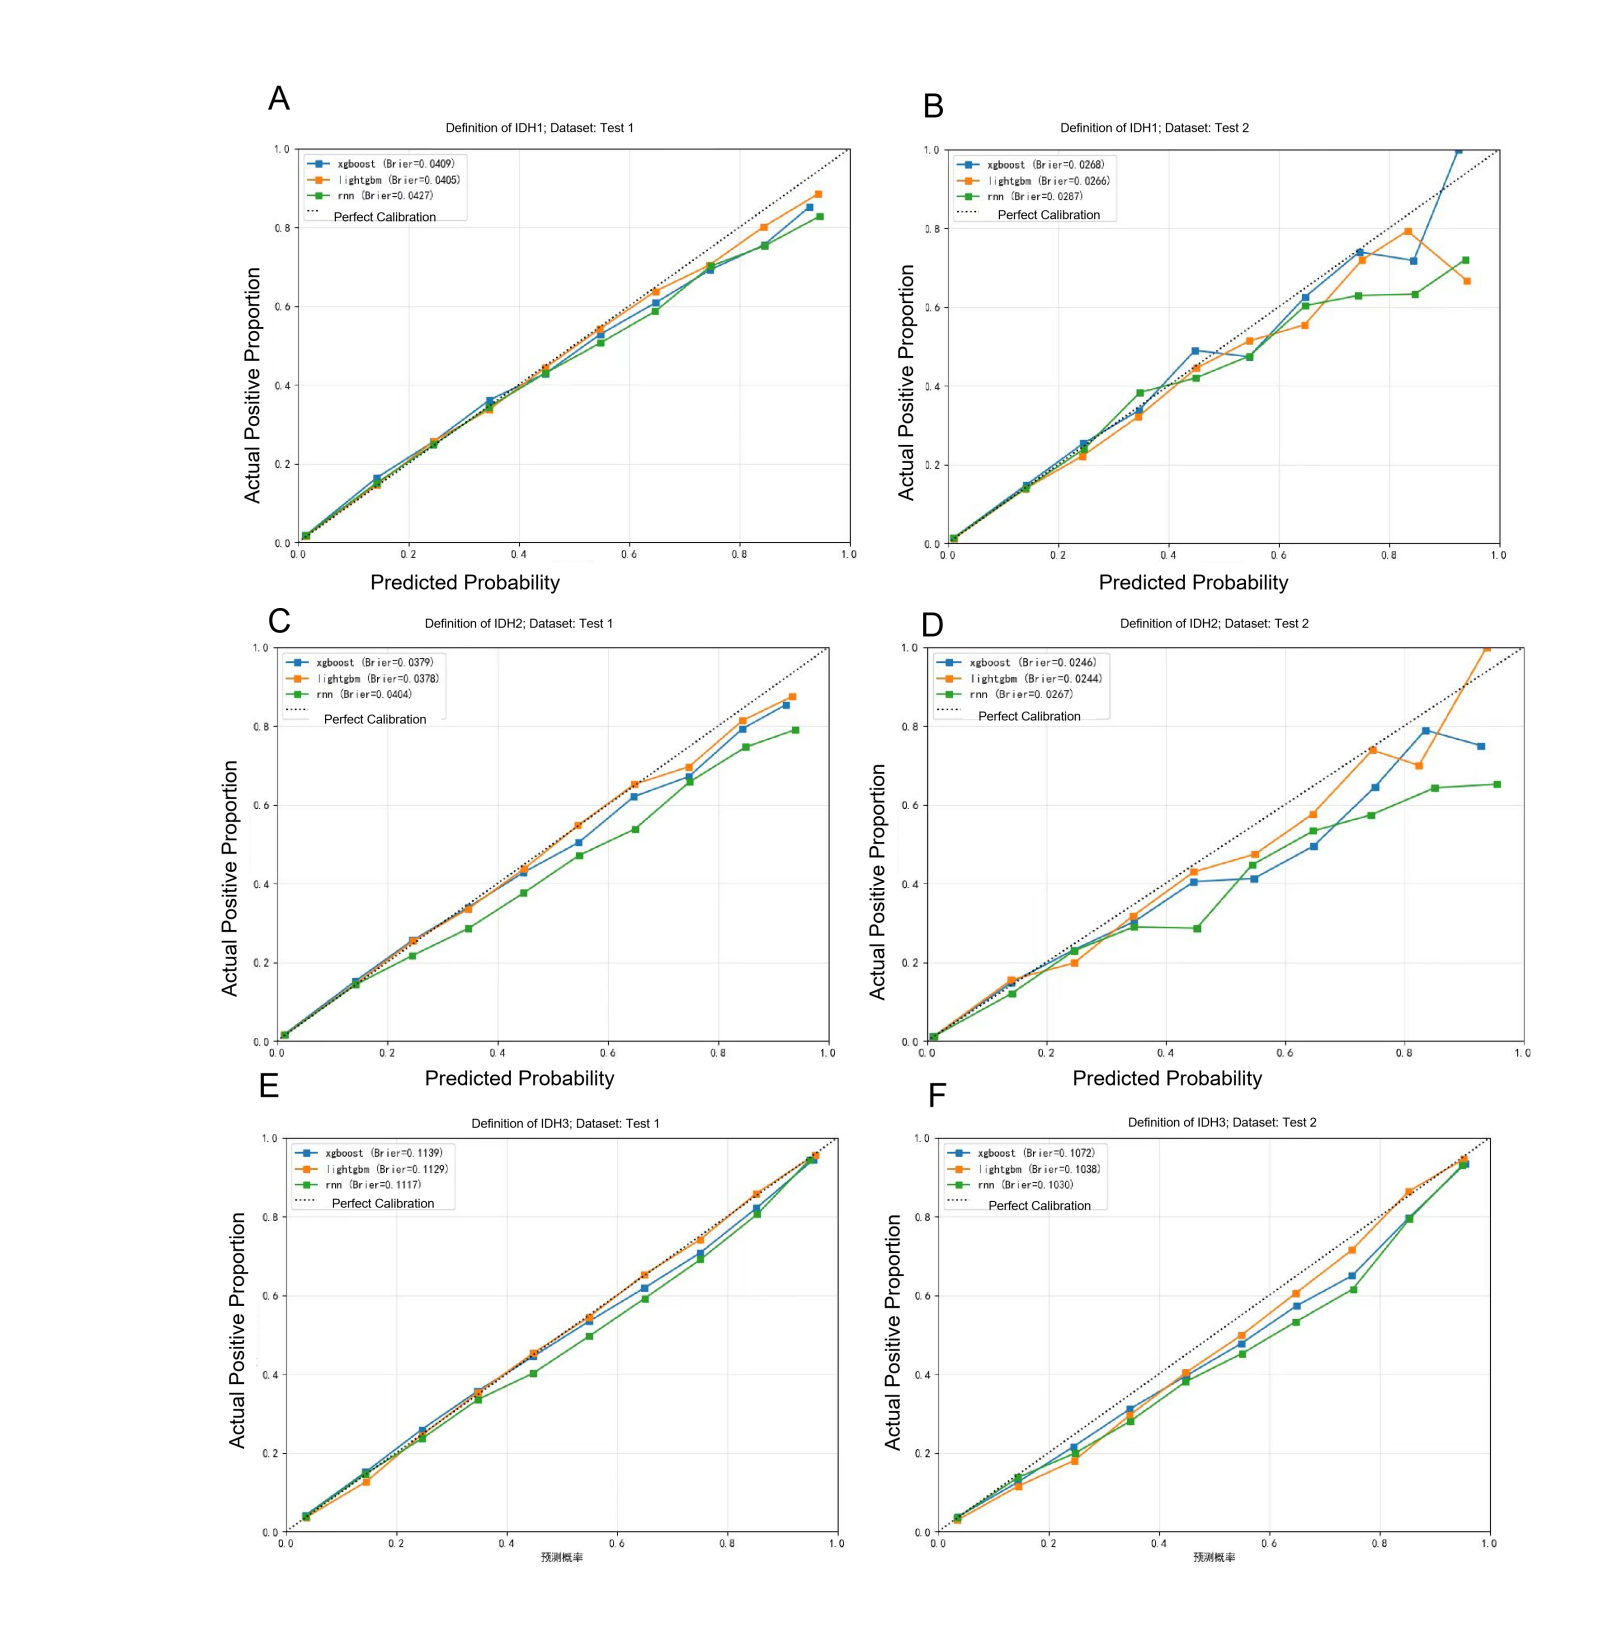


**REFERENCE**

1. Mao S, Sejdic E. A Review of Recurrent Neural Network-Based Methods in Computational Physiology. IEEE transactions on neural networks and learning systems 2023;34(10):6983–7003. (In eng). DOI: 10.1109/tnnls.2022.3145365.

2. Chen T, Guestrin C. XGBoost: a scalable tree boosting system. Proceedings of the 22nd ACM SIGKDD International Conference on Knowledge Discovery and Data Mining 2016;785–94. https://doi.org/10.1145/2939672. 2939785.

3. Ke G, Meng Q, Finley T, et al. Lightgbm, A highly efficient gradient boosting decision tree. Proceedings of the 31st International Conference on Neural Information Processing Systems 2017; 3149–3157.
